# Supplementary material for: Effect of language task demands on the neural response during lexical access: a functional magnetic resonance imaging study
Source: PubMed Central journal article supplement (PMC3869681; doi:10.1002/brb3.133), 2013-05-01

L

R

$x=-44, y=24, z=4$

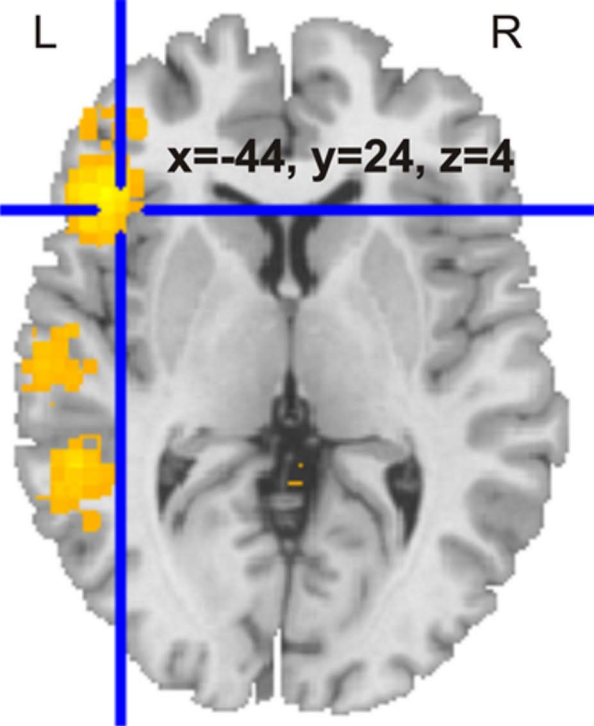

Supplement: brb30003-0402-SD1.pdf [file brb30003-0402-SD1.pdf]
